# Supplementary material
Source: publisher site journal article supplement (https://www.kjim.org/upload/media/kjim-2025-088-Supplementary-Table-1.pdf)
Supplement: Supplementary file 1 [file kjim-2025-088-Supplementary-Table-1.pdf]

**Supplementary Table 1. Details of the equation used to estimate glomerular filtration rate**

| Model                              | Equation                                                                                                                                                                                                                                                                                                                                                                                                                                                                                                                                              |
|------------------------------------|-------------------------------------------------------------------------------------------------------------------------------------------------------------------------------------------------------------------------------------------------------------------------------------------------------------------------------------------------------------------------------------------------------------------------------------------------------------------------------------------------------------------------------------------------------|
| CKD-EPI creatinine equation (2021) | Expressed as a single equation:<br>$eGFR_{Cr} = 142 \times \min(S_{Cr}/\kappa, 1)^{\alpha} \times \max(S_{Cr}/\kappa, 1)^{-1.200} \times 0.9938^{Age} \times 1.012[if\ female]$ $S_{Cr} = \text{standardized serum creatinine in mg/dL}$ $\kappa = 0.7 \text{ (females) or } 0.9 \text{ (males)}$ $\alpha = -0.241 \text{ (female) or } -0.302 \text{ (male)}$ $\min(S_{Cr}/\kappa, 1) \text{ is the minimum of } S_{Cr}/\kappa \text{ or } 1.0$ $\max(S_{Cr}/\kappa, 1) \text{ is the maximum of } S_{Cr}/\kappa \text{ or } 1.0$ $Age \text{ (yr)}$ |
| MDRD study equation                | $eGFR = 175 \times (S_{Cr})^{-1.154} \times (age)^{-0.203} \times 0.742[if\ female] \times 1.212[if\ Black]$                                                                                                                                                                                                                                                                                                                                                                                                                                          |

CKD-EPI, chronic kidney disease Epidemiology Collaboration; MDRD, Modification of Diet in Renal Disease; eGFR, estimated glomerular filtration rate.
